# Supplementary material
Source: PubMed Central journal article supplement (PMC6200941)
Supplement: supp_RA118.004613_139040_2_supp_195466_prjr0l.pdf [file supp_RA118.004613_139040_2_supp_195466_prjr0l.pdf]

## Supporting information

### **H<sub>2</sub>O<sub>2</sub> oxidation of cysteine residues in c-Jun N-terminal kinase 2 (JNK2) contributes to redox regulation in human articular chondrocytes**

Kimberly J. Nelson<sup>1</sup>, Jesalyn A. Bolduc<sup>2</sup>, John Collins<sup>2</sup>, Elizabeth A. Burke<sup>3</sup>, Julie A. Reisz<sup>3</sup>, Chananat Klomsiri<sup>1,3</sup>, Scott T. Wood<sup>2</sup>, Raghunatha R. Yammani<sup>3</sup>, Leslie B. Poole<sup>1</sup>, Cristina M. Furdui<sup>3</sup>, and Richard F. Loeser<sup>2,\*</sup>

<sup>1</sup>Department of Biochemistry, Wake Forest School of Medicine, Winston-Salem, NC, USA.

<sup>2</sup>Division of Rheumatology, Allergy and Immunology and the Thurston Arthritis Research Center, University of North Carolina at Chapel Hill, Chapel Hill, NC, USA.

<sup>3</sup>Department of Internal Medicine, Section on Molecular Medicine, Wake Forest School of Medicine, Winston-Salem, NC, USA.

#### Contents:

|          |                                                                                                                                                                                                                                                                                                                            |
|----------|----------------------------------------------------------------------------------------------------------------------------------------------------------------------------------------------------------------------------------------------------------------------------------------------------------------------------|
| Table S1 | Cysteine oxidation events identified by LC-MS/MS analysis                                                                                                                                                                                                                                                                  |
| Fig. S1  | JNK2 is oxidized upon chondrocyte FN-f stimulation.                                                                                                                                                                                                                                                                        |
| Fig. S2  | Sequence alignment of human JNK isoforms.                                                                                                                                                                                                                                                                                  |
| Fig. S3  | Sequence alignment of human MAP kinases                                                                                                                                                                                                                                                                                    |
| Fig. S4  | Positive ion MS2 spectrum of the reduced C177 peptide.                                                                                                                                                                                                                                                                     |
| Fig. S5  | Positive ion MS2 spectrum of the dimedone-labeled C222 peptide.                                                                                                                                                                                                                                                            |
| Fig. S6  | Positive ion MS2 spectrum of the (A) C6-SO <sub>2</sub> H, (B) C116-SO <sub>2</sub> H, (C) C116-SO <sub>3</sub> H, (D) C163-SO <sub>2</sub> H (E) C177-SO <sub>2</sub> H (F) C177-SO <sub>3</sub> H (G) C213-SO <sub>3</sub> H & C222-SO <sub>3</sub> H (H) C222-SO <sub>3</sub> H and (I) C222-SO <sub>2</sub> H peptides |
| Fig. S7  | Positive ion MS2 spectrum of the (A) C222-C213 and (B) C222-C177 disulfide bonded peptides in JNK $\alpha$ 2.                                                                                                                                                                                                              |

**Table S1. Cysteine oxidation events identified by LC-MS/MS analysis**

|            | Experiment 1<br>(DTT present, free thiols trapped with IAM, no disulfide analysis) |                                                                     | Experiment 2<br>(pre-reduced JNK, free thiols trapped with MSBT, disulfide analysis)                 |                                                                                                      |
|------------|------------------------------------------------------------------------------------|---------------------------------------------------------------------|------------------------------------------------------------------------------------------------------|------------------------------------------------------------------------------------------------------|
|            | DTT<br>0 $\mu\text{M}$ $\text{H}_2\text{O}_2$                                      | DTT<br>$5 \times 100 \mu\text{M}$ $\text{H}_2\text{O}_2$            | DTT                                                                                                  | 100 $\mu\text{M}$ $\text{H}_2\text{O}_2$                                                             |
| C6         | IAM                                                                                | IAM                                                                 | MSBT                                                                                                 | MSBT<br>SO <sub>2</sub> H (Fig. S6A)                                                                 |
| C41        | IAM                                                                                | IAM                                                                 | MSBT                                                                                                 | N.D. <sup>1</sup>                                                                                    |
| C79        | IAM                                                                                | IAM                                                                 | N.D. <sup>1</sup>                                                                                    | MSBT                                                                                                 |
| C116       | IAM<br>SO <sub>2</sub> H (Fig. S6B)<br>SO <sub>3</sub> H (Fig. S6C)                | IAM<br>SO <sub>2</sub> H (Fig. S6B)<br>SO <sub>3</sub> H (Fig. S6C) | N.D. <sup>1</sup>                                                                                    | SH                                                                                                   |
| C137       | IAM                                                                                | IAM                                                                 | MSBT                                                                                                 | MSBT                                                                                                 |
| C163       | IAM                                                                                | IAM                                                                 | MSBT                                                                                                 | MSBT<br>SO <sub>2</sub> H (Fig. S6D)                                                                 |
| C177       | SH (Fig. S4)                                                                       | SH (Fig. S4)                                                        | MSBT<br>SO <sub>2</sub> H (Fig. S6E)<br>SO <sub>3</sub> H (Fig. S6F)                                 | MSBT<br>SO <sub>2</sub> H (Fig. S6E)<br>SO <sub>3</sub> H (Fig. S6F)                                 |
| C213       | IAM                                                                                | IAM<br>SO <sub>3</sub> H (Fig. S6G)                                 | MSBT                                                                                                 | MSBT                                                                                                 |
| C222       | IAM                                                                                | IAM<br>dimedone (Fig. S5)                                           | MSBT (Fig. 4A)<br>SO <sub>2</sub> H (Fig. S6H)<br>SO <sub>3</sub> H (Fig. S6I)<br>dimedone (Fig. 4A) | MSBT (Fig. 4A)<br>SO <sub>2</sub> H (Fig. S6H)<br>SO <sub>3</sub> H (Fig. S6I)<br>dimedone (Fig. 4A) |
| C423       | N.D. <sup>1</sup>                                                                  | N.D. <sup>1</sup>                                                   | N.D. <sup>1</sup>                                                                                    | N.D. <sup>1</sup>                                                                                    |
| disulfides | Not measured <sup>2</sup>                                                          | Not measured <sup>2</sup>                                           | 0 disulfides detected                                                                                | 2 disulfides detected<br>C222-C213 (Fig S7A)<br>C222-C177 (Fig. S7B)                                 |

<sup>1</sup>Not detected

<sup>2</sup>Excess DTT present in the assay did not allow for detection of disulfide bonds

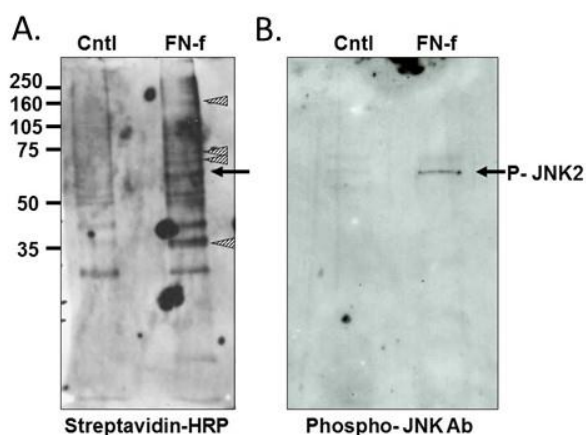

Fig. S1. JNK2 is oxidized upon chondrocyte FN-f stimulation. Chondrocytes were stimulated for 45 min with fibronectin fragment (FN-f) or control (Cntl) media. A biotin-labeled dimedone analog (DCP-Bio1) was added to the cell lysis buffer in order to label sulfenic acid-containing proteins. DCP-Bio1 labeled proteins were enriched using streptavidin-linked beads and separated by SDS-PAGE. Affinity-captured proteins were visualized by: **(A)** immunoblotting with streptavidin-HRP and **(B)** anti-phospho-JNK Ab. Black arrows indicate the expected protein band for JNK2 and striped arrowheads indicate additional proteins affinity captured after FN-f stimulation.

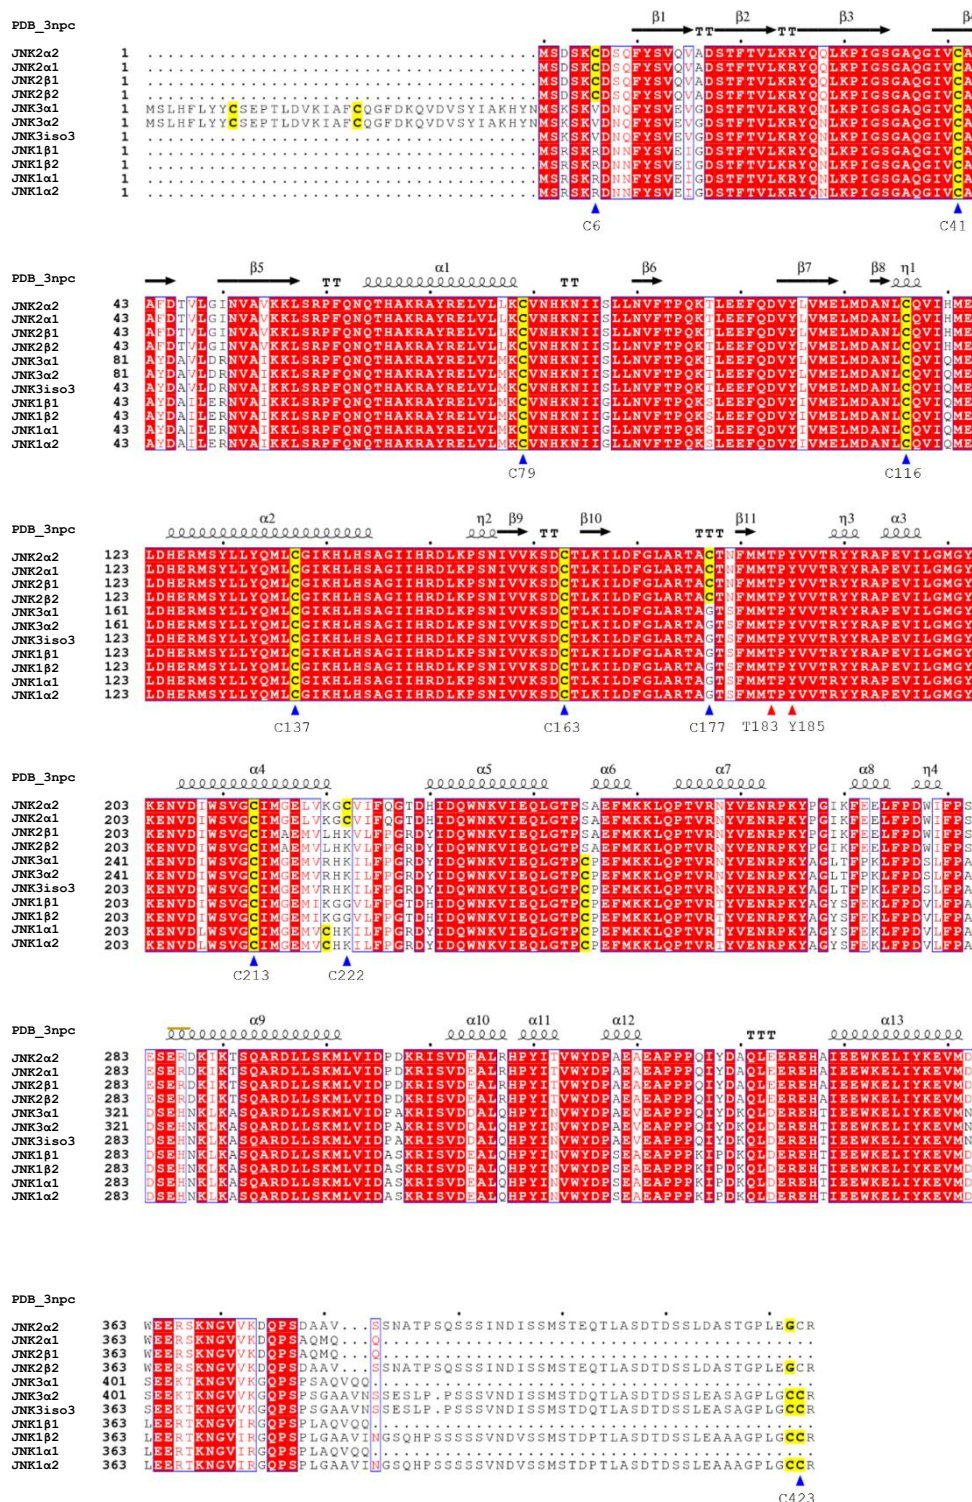

Fig. S2. Sequence alignment of human JNK isoforms. JNK sequences were aligned using Clustal Omega(1). Cysteine residues are highlighted in yellow. Cysteine residues and phosphorylation sites in JNK2 are indicated with blue and pink arrows, respectively.

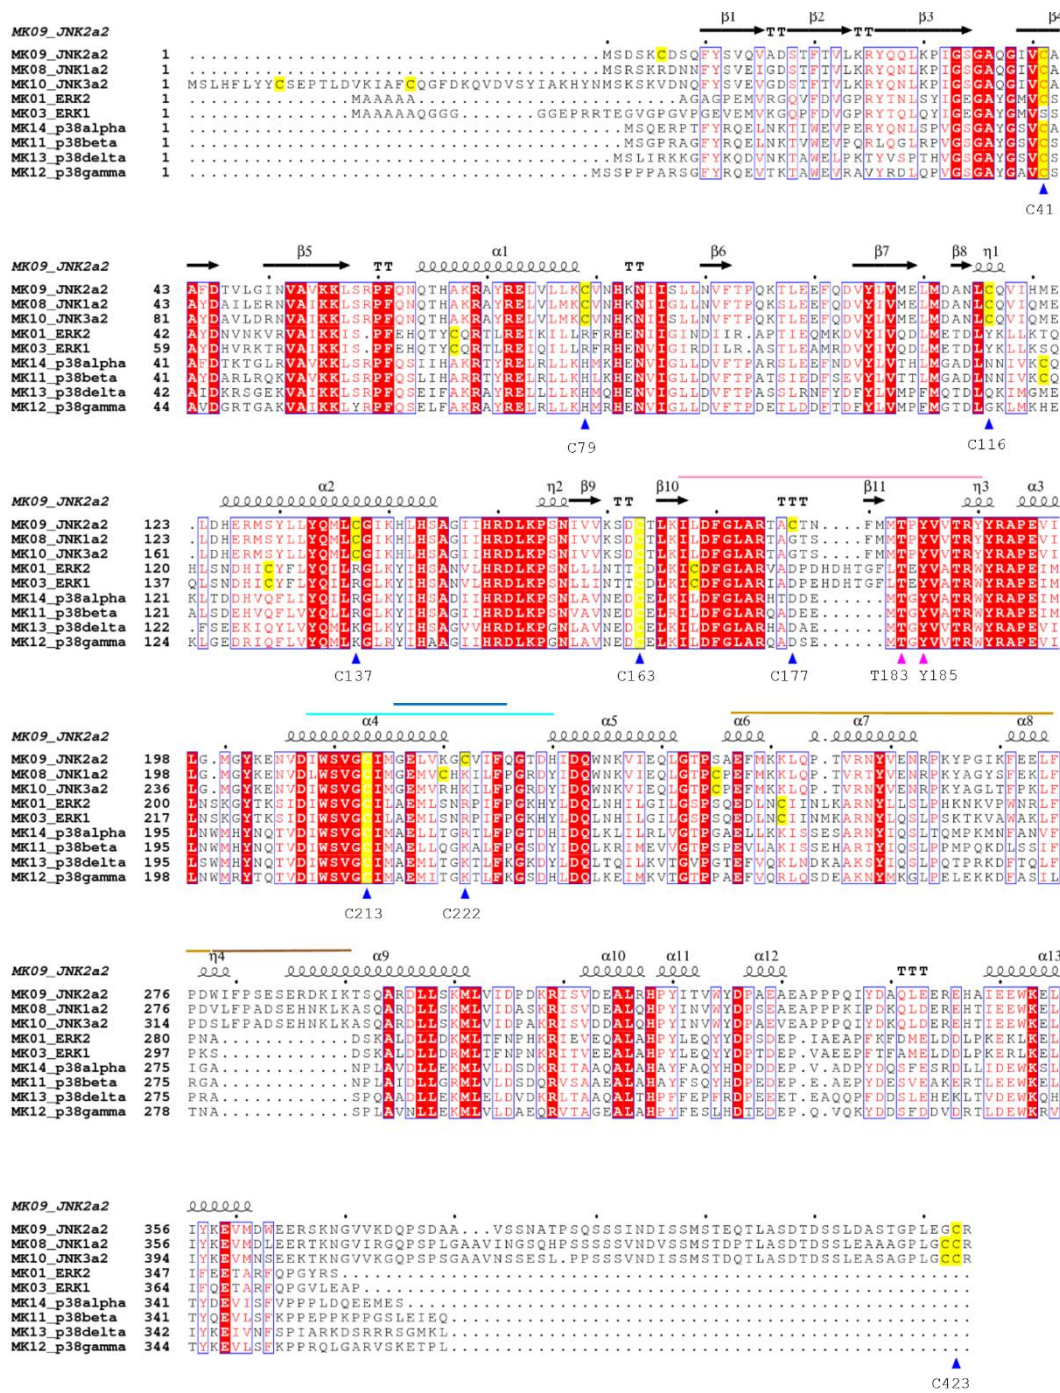

Fig. S3. Sequence alignment of human MAP kinases. MAP kinase sequences (Genbank accession numbers: NP\_002743.3, NP\_620707.1, NP\_620708.1, NP\_620709.1, NP\_620634.1, NP\_001310231.1, NP\_001265476.1, NP\_620637.1, NP\_620448.1, NP\_002744.1, NP\_620407.1, NP\_002737.2, NP\_002960.2, NP\_620581.1, NP\_002745.1, NP\_002742.3) were aligned using Clustal Omega(1). Cysteine residues are highlighted in yellow. Cysteine residues and phosphorylation sites in JNK2 are indicated with blue and pink arrows, respectively. Important functional regions of the JNK structure are indicated with lines above the alignment including the JNK2 substrate specificity-determining region (2) in cyan, the  $\alpha$ -region(3) in blue, the activation loop in pink, the MAP kinase insert in tan, and the JNK insert in brown.

TAC<sup>177</sup>TNFMMPYVVTR, C177-SH

Precursor ion: +3

Xcorr: 1.29

|    | <b>b</b>   | <b>Seq.</b> | <b>y</b>   |    |
|----|------------|-------------|------------|----|
| 1  | 51.53112   | T           |            |    |
| 2  | 87.04968   | A           | 1058.49431 | 17 |
| 3  | 138.55427  | C           | 1022.97575 | 16 |
| 4  | 189.07811  | T           | 971.47116  | 15 |
| 5  | 246.09958  | N           | 920.94732  | 14 |
| 6  | 319.63379  | F           | 863.92585  | 13 |
| 7  | 385.15404  | M           | 790.39164  | 12 |
| 8  | 450.67429  | M           | 724.87139  | 11 |
| 9  | 501.19813  | T           | 659.35114  | 10 |
| 10 | 549.72451  | P           | 608.82730  | 9  |
| 11 | 631.25617  | Y           | 560.30092  | 8  |
| 12 | 680.79038  | V           | 478.76926  | 7  |
| 13 | 730.32459  | V           | 429.23505  | 6  |
| 14 | 780.84843  | T           | 379.70084  | 5  |
| 15 | 858.89899  | R           | 329.17700  | 4  |
| 16 | 940.43065  | Y           | 251.12644  | 3  |
| 17 | 1021.96231 | Y           | 169.59478  | 2  |
|    |            | R           | 88.06312   | 1  |

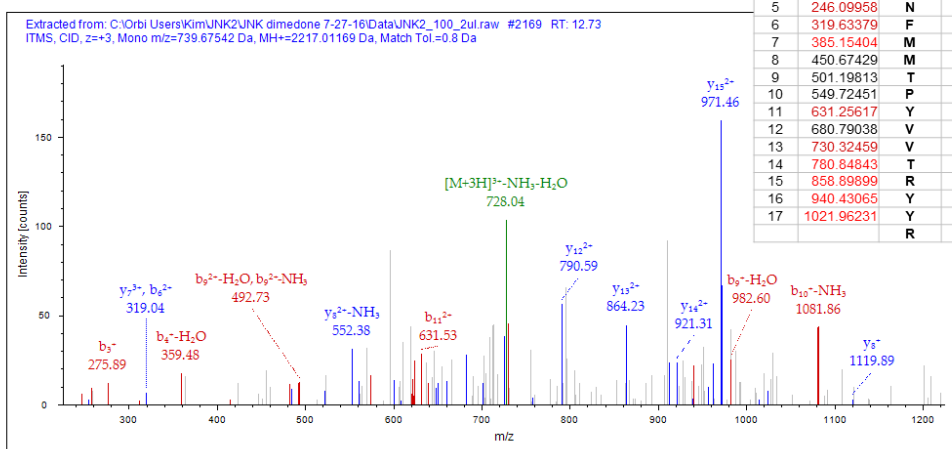

Fig. S4. Positive ion MS2 spectrum of the reduced C177 peptide. Spectra were obtained after treating recombinant His-tagged JNK2 $\alpha$ 2 with and without 5 additions of 100  $\mu$ M H<sub>2</sub>O<sub>2</sub> in the presence of 5 mM DTT and 5 mM dimedone (Table SI, Experiment 1). Free thiols were blocked with IAM prior to digestion with trypsin. The resulting peptides were analyzed by LC-MS/MS using an Accela Open UPLC coupled to a Thermo Scientific Orbi-trap LTQ XL mass spectrometer.

GC<sup>222</sup>VIFQGDHIDQWNK, C222-dimedone  
 Precursor ion: +3  
 Xcorr: 1.16

|    | b <sup>+</sup> | Seq.       | y <sup>+</sup> |    |
|----|----------------|------------|----------------|----|
| 1  | 58.02875       | G          |                |    |
| 2  | 299.10604      | C-dimedone | 1941.91645     | 15 |
| 3  | 398.17446      | V          | 1700.83916     | 14 |
| 4  | 511.25853      | I          | 1601.77074     | 13 |
| 5  | 658.32695      | F          | 1488.68667     | 12 |
| 6  | 786.38553      | Q          | 1341.61825     | 11 |
| 7  | 843.40700      | G          | 1213.55967     | 10 |
| 8  | 944.45468      | T          | 1156.53820     | 9  |
| 9  | 1059.48163     | D          | 1055.49052     | 8  |
| 10 | 1196.54054     | H          | 940.46357      | 7  |
| 11 | 1309.62461     | I          | 803.40466      | 6  |
| 12 | 1424.65156     | D          | 690.32059      | 5  |
| 13 | 1552.71014     | Q          | 575.29364      | 4  |
| 14 | 1738.78946     | W          | 447.23506      | 3  |
| 15 | 1852.83239     | N          | 261.15574      | 2  |
|    |                | K          | 147.11281      | 1  |

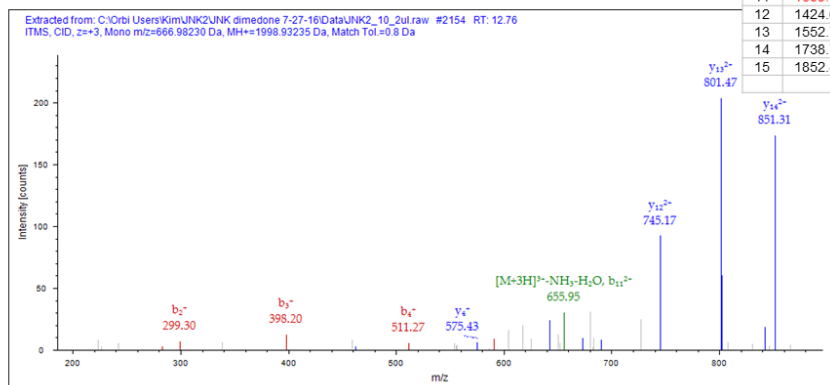

Fig. S5. Positive ion MS2 spectrum of the dimedone-labeled C222 peptide. Spectra were obtained after treating recombinant His-tagged JNK2 $\alpha$ 2 with and without 5 additions of 100  $\mu$ M H<sub>2</sub>O<sub>2</sub> in the presence of 5 mM DTT and 5 mM dimedone (Table SI, Experiment 1). Free thiols were blocked with IAM prior to digestion with trypsin. The resulting peptides were analyzed by LC-MS/MS using an Accela Open UPLC coupled to a Thermo Scientific Orbi-trap LTQ XL mass spectrometer.

A.

C<sup>6</sup>DSQFYSVQVADSTFTVLK, C6-Dioxidation  
 Precursor Ion: +3  
 XCorr: 2.54

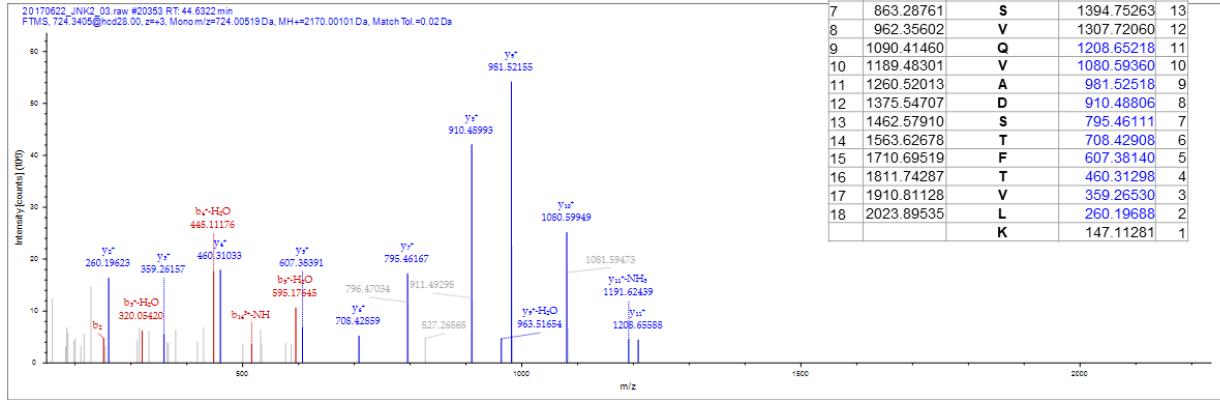

B.

TLEEFQDVYLV<sup>108</sup>ELM<sup>111</sup>DANLC<sup>116</sup>QVIHM<sup>121</sup>ELDHER, M108-Oxidation,  
 M111-Oxidation, C116-Dioxidation, M121-Oxidation  
 Precursor ion: +4  
 Xcorr: 1.76

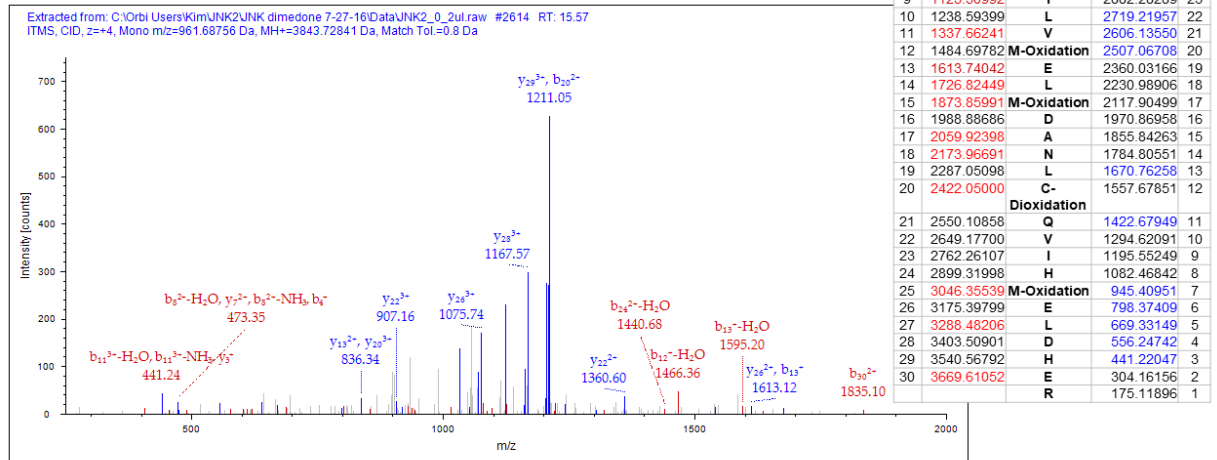



C.

TLEEFQDVYLVMEMLM<sup>111</sup>DANLC<sup>116</sup>QVIHM<sup>121</sup>ELDHER, M111-Oxidation, C116-Trioxidation, M121-Oxidation

Precursor ion: +4

Xcorr: 1.67

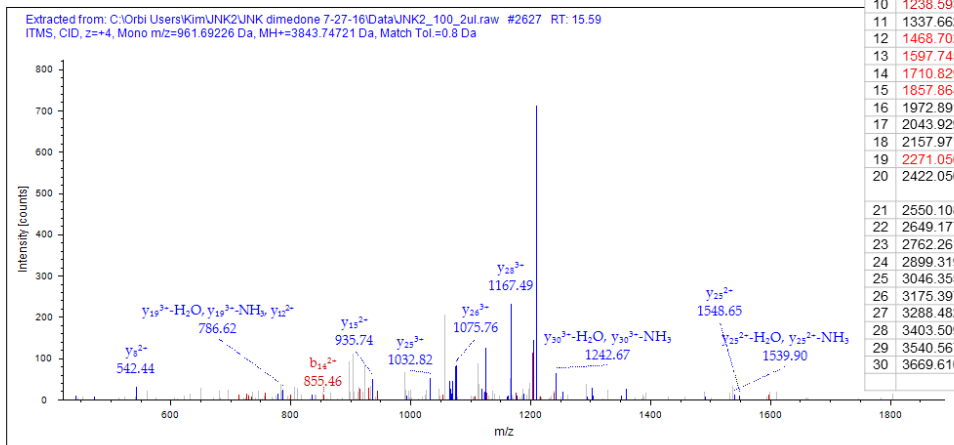

|              | b <sup>+</sup> | Seq.        | y <sup>+</sup> |    |
|--------------|----------------|-------------|----------------|----|
| 1            | 102.05496      | T           |                |    |
| 2            | 215.13903      | L           | 3742.67453     | 30 |
| 3            | 344.18163      | E           | 3629.59046     | 29 |
| 4            | 473.22423      | E           | 3500.54786     | 28 |
| 5            | 620.29265      | F           | 3371.50526     | 27 |
| 6            | 748.35123      | Q           | 3224.43684     | 26 |
| 7            | 863.37818      | D           | 3096.37826     | 25 |
| 8            | 962.44660      | V           | 2981.35131     | 24 |
| 9            | 1125.50992     | Y           | 2882.28289     | 23 |
| 10           | 1238.59399     | L           | 2719.21957     | 22 |
| 11           | 1337.66241     | V           | 2606.13550     | 21 |
| 12           | 1468.70291     | M           | 2507.06708     | 20 |
| 13           | 1597.74551     | E           | 2376.02658     | 19 |
| 14           | 1710.82958     | L           | 2246.98398     | 18 |
| 15           | 1857.86499     | M-Oxidation | 2133.89991     | 17 |
| 16           | 1972.89194     | D           | 1986.86449     | 16 |
| 17           | 2043.92906     | A           | 1871.83754     | 15 |
| 18           | 2157.97199     | N           | 1800.80042     | 14 |
| 19           | 2271.05606     | L           | 1686.75749     | 13 |
| 20           | 2422.05000     | C-          | 1573.67342     | 12 |
| Trioxidation |                |             |                |    |
| 21           | 2550.10858     | Q           | 1422.67949     | 11 |
| 22           | 2649.17700     | V           | 1294.62091     | 10 |
| 23           | 2762.26107     | I           | 1195.55249     | 9  |
| 24           | 2899.31998     | H           | 1082.46842     | 8  |
| 25           | 3046.35539     | M-Oxidation | 945.40951      | 7  |
| 26           | 3175.39799     | E           | 798.37409      | 6  |
| 27           | 3288.48206     | L           | 669.33149      | 5  |
| 28           | 3403.50901     | D           | 556.24742      | 4  |
| 29           | 3540.56792     | H           | 441.22047      | 3  |
| 30           | 3669.61052     | E           | 304.16156      | 2  |
|              |                | R           | 175.11896      | 1  |

D.

SDC<sup>163</sup>TLKILDFGLAR, C163-Dioxidation

Precursor ion: +3

XCorr: 1.17

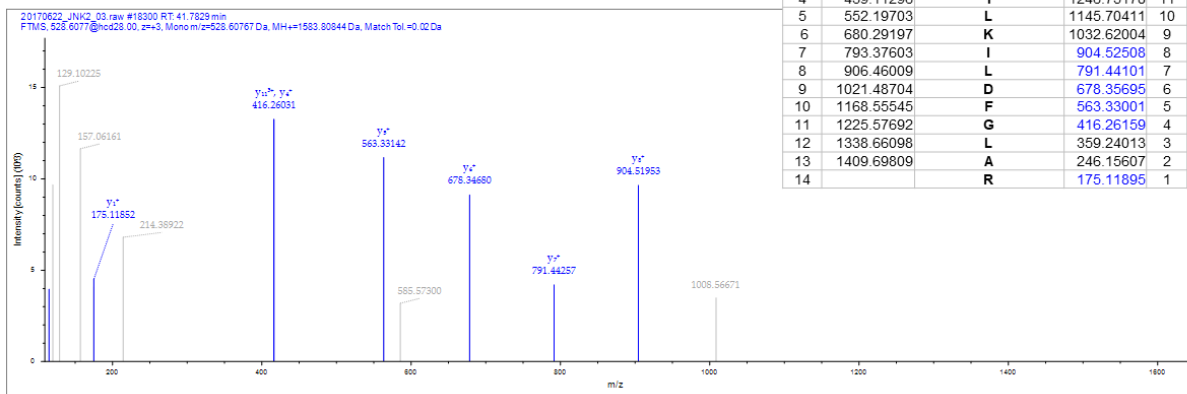

|    | b <sup>+</sup> | Seq.          | y <sup>+</sup> |    |
|----|----------------|---------------|----------------|----|
| 1  | 88.03931       | S             |                | 14 |
| 2  | 203.06626      | D             | 1496.77774     | 13 |
| 3  | 338.06528      | C-Dioxidation | 1381.75080     | 12 |
| 4  | 439.11296      | T             | 1246.75178     | 11 |
| 5  | 552.19703      | L             | 1145.70411     | 10 |
| 6  | 680.29197      | K             | 1032.62004     | 9  |
| 7  | 793.37603      | I             | 904.52508      | 8  |
| 8  | 906.46009      | L             | 791.44101      | 7  |
| 9  | 1021.48704     | D             | 678.35695      | 6  |
| 10 | 1168.55545     | F             | 563.33001      | 5  |
| 11 | 1225.57692     | G             | 416.26159      | 4  |
| 12 | 1338.66098     | L             | 359.24013      | 3  |
| 13 | 1409.69809     | A             | 246.15607      | 2  |
| 14 |                | R             | 175.11895      | 1  |

E.

TAC<sup>177</sup>TNFM<sup>181</sup>M<sup>182</sup>TPYVVTR, M181-Oxidation, M182-Oxidation,  
C177-Dioxidation  
Precursor Ion: +2  
XCorr:1.64

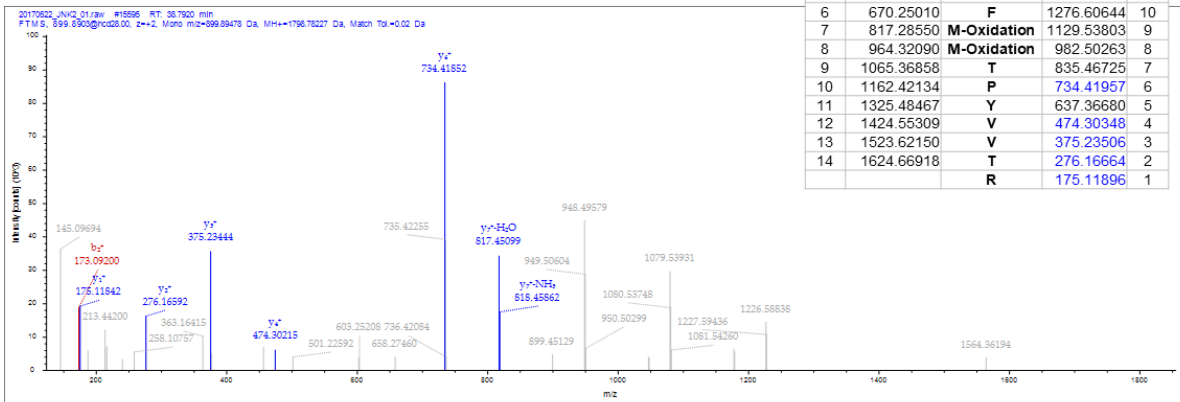

|    | b <sup>+</sup> | Seq.          | y <sup>+</sup> |    |
|----|----------------|---------------|----------------|----|
| 1  | 102.05496      | T             |                |    |
| 2  | 173.09208      | A             | 1697.73318     | 14 |
| 3  | 308.09108      | C-Dioxidation | 1626.69606     | 13 |
| 4  | 409.13876      | T             | 1491.69705     | 12 |
| 5  | 523.18169      | N             | 1390.64937     | 11 |
| 6  | 670.25010      | F             | 1276.60644     | 10 |
| 7  | 817.28550      | M-Oxidation   | 1129.53803     | 9  |
| 8  | 964.32090      | M-Oxidation   | 982.50263      | 8  |
| 9  | 1065.36858     | T             | 835.46725      | 7  |
| 10 | 1162.42134     | P             | 734.41957      | 6  |
| 11 | 1325.48467     | Y             | 637.36680      | 5  |
| 12 | 1424.55309     | V             | 474.30348      | 4  |
| 13 | 1523.62150     | V             | 375.23506      | 3  |
| 14 | 1624.66918     | T             | 276.16664      | 2  |
|    |                | R             | 175.11896      | 1  |

F.

TAC<sup>177</sup>TNFM<sup>181</sup>M<sup>182</sup>TPYVVTR, M181-Oxidation, M182-Oxidation,  
C177-Trioxidation  
Precursor Ion: +2  
XCorr: 1.60

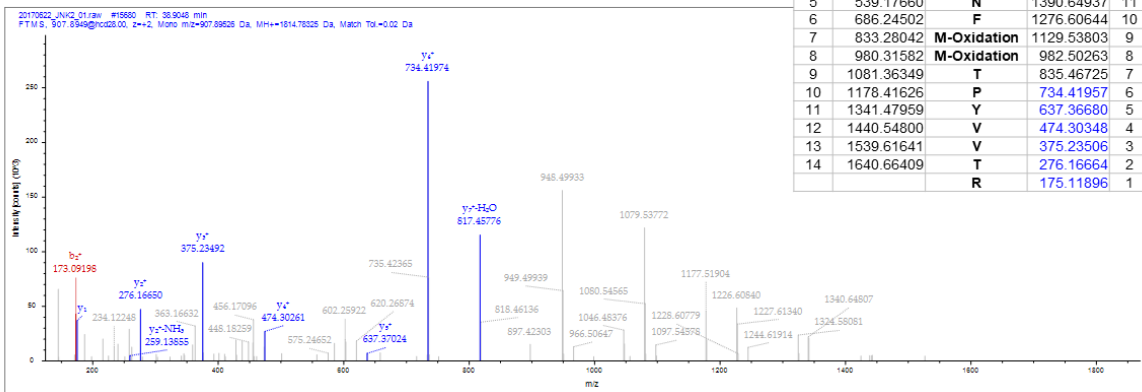

|    | b <sup>+</sup> | Seq.           | y <sup>+</sup> |    |
|----|----------------|----------------|----------------|----|
| 1  | 102.05496      | T              |                |    |
| 2  | 173.09208      | A              | 1713.72809     | 14 |
| 3  | 324.08600      | C-Trioxidation | 1642.69098     | 13 |
| 4  | 425.13368      | T              | 1491.69705     | 12 |
| 5  | 539.17660      | N              | 1390.64937     | 11 |
| 6  | 686.24502      | F              | 1276.60644     | 10 |
| 7  | 833.28042      | M-Oxidation    | 1129.53803     | 9  |
| 8  | 980.31582      | M-Oxidation    | 982.50263      | 8  |
| 9  | 1081.36349     | T              | 835.46725      | 7  |
| 10 | 1178.41626     | P              | 734.41957      | 6  |
| 11 | 1341.47959     | Y              | 637.36680      | 5  |
| 12 | 1440.54800     | V              | 474.30348      | 4  |
| 13 | 1539.61641     | V              | 375.23506      | 3  |
| 14 | 1640.66409     | T              | 276.16664      | 2  |
|    |                | R              | 175.11896      | 1  |

### G.

ENVDIWSVGC<sup>213</sup>IMGELVKGC<sup>222</sup>VIFQGTDHIDQWNK, C213-Trioxidation, M215-Oxidation, C222-Trioxidation

Precursor ion: +4

Xcorr: 0.54

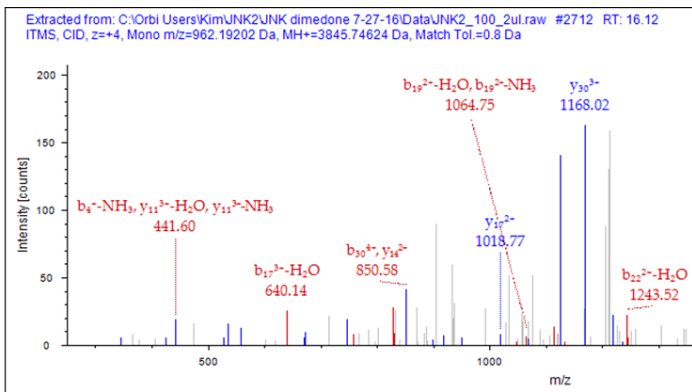

|    | b <sup>+</sup> | b <sup>+</sup> * | b <sup>+</sup> ** | Seq.           | y <sup>+</sup> * | y <sup>+</sup> ** |    |
|----|----------------|------------------|-------------------|----------------|------------------|-------------------|----|
| 1  | 130.04988      | 44.02148         | 33.26793          | E              |                  |                   | 33 |
| 2  | 244.09281      | 82.03579         | 61.77866          | N              | 1858.85620       | 1239.57256        | 32 |
| 3  | 343.16123      | 115.05859        | 86.54576          | V              | 1801.83374       | 1201.55825        | 31 |
| 4  | 458.18818      | 153.40091        | 115.30250         | D              | 1752.29953       | 1168.53544        | 30 |
| 5  | 571.27225      | 191.09560        | 143.57352         | I              | 1694.78605       | 1130.19313        | 29 |
| 6  | 757.35157      | 253.12204        | 190.09335         | W              | 1638.24402       | 1092.49844        | 28 |
| 7  | 844.38360      | 282.13272        | 211.85136         | S              | 1545.20436       | 1030.47200        | 27 |
| 8  | 943.45202      | 315.15552        | 236.61846         | V              | 1501.68834       | 1001.46132        | 26 |
| 9  | 1000.47349     | 334.16268        | 250.87383         | G              | 1452.15413       | 968.43851         | 25 |
| 10 | 1151.46742     | 384.49399        | 288.62231         | C-Trioxidation | 1423.64340       | 949.43136         | 24 |
| 11 | 1264.55149     | 422.18868        | 316.89333         | I              | 1348.14643       | 899.10004         | 23 |
| 12 | 1411.58691     | 471.20049        | 353.65218         | M-Oxidation    | 1291.60439       | 861.40535         | 22 |
| 13 | 1468.60838     | 490.20764        | 367.90755         | G              | 1218.08669       | 812.39355         | 21 |
| 14 | 1597.65098     | 533.22184        | 400.16820         | E              | 1189.57959       | 793.38639         | 20 |
| 15 | 1710.73505     | 570.91653        | 428.43922         | L              | 1125.05465       | 750.37219         | 19 |
| 16 | 1809.80347     | 603.93934        | 453.20632         | V              | 1068.51262       | 712.67750         | 18 |
| 17 | 1937.89844     | 646.63766        | 485.23007         | K              | 1018.97841       | 679.65470         | 17 |
| 18 | 1994.91991     | 665.64482        | 499.48543         | G              | 954.93092        | 636.95637         | 16 |
| 19 | 2145.91384     | 715.97613        | 537.23392         | C-Trioxidation | 926.42019        | 617.94922         | 15 |
| 20 | 2244.98226     | 748.99894        | 562.0102          | V              | 850.92322        | 567.61790         | 14 |
| 21 | 2358.06633     | 786.69363        | 590.27204         | I              | 801.38901        | 534.59510         | 13 |
| 22 | 2505.13475     | 835.71643        | 627.03914         | F              | 744.84697        | 496.90041         | 12 |
| 23 | 2633.19333     | 878.40263        | 659.05379         | Q              | 671.31276        | 447.67760         | 11 |
| 24 | 2690.21400     | 897.40978        | 673.30916         | G              | 607.26347        | 405.19141         | 10 |
| 25 | 2791.26248     | 931.09234        | 698.57108         | T              | 578.77274        | 386.18425         | 9  |
| 26 | 2906.28943     | 969.43466        | 727.32781         | D              | 528.24890        | 352.50169         | 8  |
| 27 | 3043.34834     | 1015.12096       | 761.59254         | H              | 470.73542        | 314.15937         | 7  |
| 28 | 3156.43241     | 1052.81565       | 789.86356         | I              | 402.20597        | 268.47307         | 6  |
| 29 | 3271.45936     | 1091.15797       | 818.62030         | D              | 345.66393        | 230.77838         | 5  |
| 30 | 3399.51794     | 1133.84416       | 850.63494         | Q              | 288.15046        | 192.43606         | 4  |
| 31 | 3585.59726     | 1195.87060       | 897.15477         | W              | 224.12117        | 149.74987         | 3  |
| 32 | 3699.64019     | 1233.88491       | 925.66550         | N              | 131.08151        | 87.72343          | 2  |
| 33 |                |                  |                   | K              | 74.06004         | 49.70912          | 1  |

### H.

GC<sup>222</sup>VIFQGTDHIDQWNK, C222-Dioxidation

Precursor ion: +3,

XCorr: 4.16

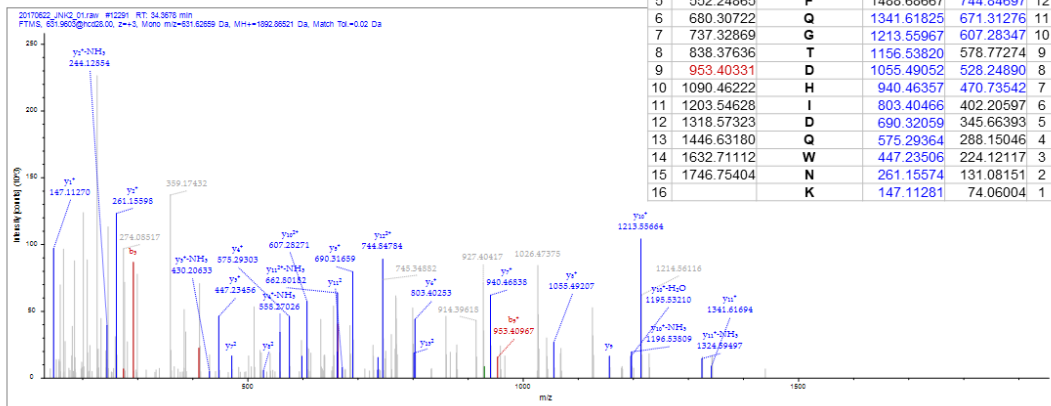

|    | b <sup>+</sup> | Seq.          | y <sup>+</sup> * | y <sup>+</sup> ** |    |
|----|----------------|---------------|------------------|-------------------|----|
| 1  | 58.02874       | G             |                  | 954.93092         | 16 |
| 2  | 193.02775      | C-Dioxidation | 1835.83811       | 926.42019         | 15 |
| 3  | 292.09617      | V             | 1700.83909       | 850.92322         | 14 |
| 4  | 405.18023      | I             | 1601.77074       | 801.38901         | 13 |
| 5  | 552.24865      | F             | 1488.68667       | 744.84697         | 12 |
| 6  | 680.30722      | Q             | 1341.61825       | 671.31276         | 11 |
| 7  | 737.32869      | G             | 1213.55967       | 607.28347         | 10 |
| 8  | 838.37636      | T             | 1156.53820       | 578.77274         | 9  |
| 9  | 953.40331      | D             | 1055.49052       | 528.24890         | 8  |
| 10 | 1090.46222     | H             | 940.46357        | 470.73542         | 7  |
| 11 | 1203.54628     | I             | 803.40466        | 402.20597         | 6  |
| 12 | 1318.57323     | D             | 690.32059        | 345.66393         | 5  |
| 13 | 1446.63180     | Q             | 575.29364        | 288.15046         | 4  |
| 14 | 1632.71112     | W             | 447.23506        | 224.12117         | 3  |
| 15 | 1746.75404     | N             | 261.15574        | 131.08151         | 2  |
| 16 |                | K             | 147.11281        | 74.06004          | 1  |

I.

GC<sub>222</sub>VIFQGDHIDQWVK, C222-Trioxidation  
 Precursor Ion: +2  
 XCorr: 2.42

|    | b <sup>+</sup> | Seq.                  | y <sup>+</sup> | y <sup>2+</sup> |    |
|----|----------------|-----------------------|----------------|-----------------|----|
| 1  | 58.02874       | <b>G</b>              |                |                 | 16 |
| 2  | 209.02267      | <b>C-Trioxidation</b> | 1851.83302     | 926.42019       | 15 |
| 3  | 308.09108      | <b>V</b>              | 1700.83909     | 850.92322       | 14 |
| 4  | 421.17515      | <b>I</b>              | 1601.77074     | 801.38901       | 13 |
| 5  | 568.24356      | <b>F</b>              | 1488.68667     | 744.84697       | 12 |
| 6  | 696.30214      | <b>Q</b>              | 1341.61825     | 671.31276       | 11 |
| 7  | 753.32360      | <b>G</b>              | 1213.55967     | 607.28347       | 10 |
| 8  | 854.37128      | <b>T</b>              | 1156.53820     | 578.77274       | 9  |
| 9  | 969.39822      | <b>D</b>              | 1055.49052     | 528.24890       | 8  |
| 10 | 1106.45713     | <b>H</b>              | 940.46357      | 470.73542       | 7  |
| 11 | 1219.54120     | <b>I</b>              | 803.40466      | 402.20597       | 6  |
| 12 | 1334.56814     | <b>D</b>              | 690.32059      | 345.66393       | 5  |
| 13 | 1462.62672     | <b>Q</b>              | 575.29364      | 288.15046       | 4  |
| 14 | 1648.70603     | <b>W</b>              | 447.23506      | 224.12117       | 3  |
| 15 | 1762.74896     | <b>N</b>              | 261.15574      | 131.08151       | 2  |
| 16 |                | <b>K</b>              | 147.11281      | 74.06004        | 1  |

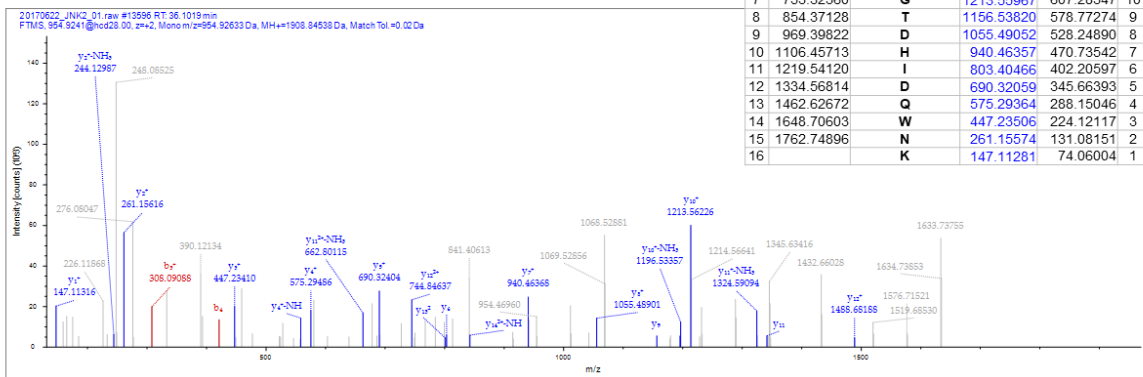

Fig. S6. Positive ion MS2 spectrum of the (A) C6-SO<sub>2</sub>H, (B) C116-SO<sub>2</sub>H, (C) C116-SO<sub>3</sub>H, (D) C163-SO<sub>2</sub>H (E) C177-SO<sub>2</sub>H (F) C177-SO<sub>3</sub>H (G) C213-SO<sub>3</sub>H & C222-SO<sub>3</sub>H (H) C222-SO<sub>3</sub>H and (I) C222-SO<sub>2</sub>H peptides. Spectra B, C, and G were obtained after treating recombinant His-tagged JNK2α2 with or without 5 additions of 100 μM H<sub>2</sub>O<sub>2</sub> in the presence of 5 mM DTT and 5 mM dimedone (Table SI, Experiment 1). Free thiols were blocked with IAM prior to digestion with trypsin. The resulting peptides were analyzed by LC-MS/MS using an Accela Open UPLC coupled to a Thermo Scientific Orbitrap LTQ XL mass spectrometer. Spectra A, D, E, F, H, and I were obtained after incubating pre-reduced His-tagged JNK2α2 with or without 100 μM H<sub>2</sub>O<sub>2</sub> in the presence of 5 mM dimedone (Table SI, Experiment 2). Free thiols were blocked with MSBT prior to digestion with trypsin. The resulting peptides were analyzed by LC-MS/MS using Q Exactive HF hybrid quadrupole-Orbitrap mass spectrometer (Thermo Scientific) coupled to a Dionex Ultimate-3000 nano-UPLC system (Thermo Scientific) and a Nanospray Flex Ion Source (Thermo Scientific).

A.

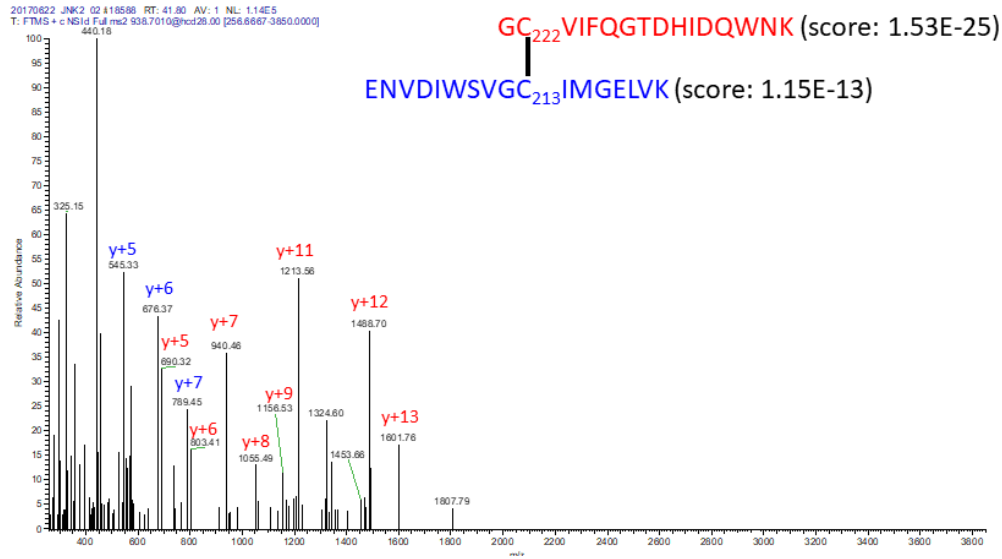

B.

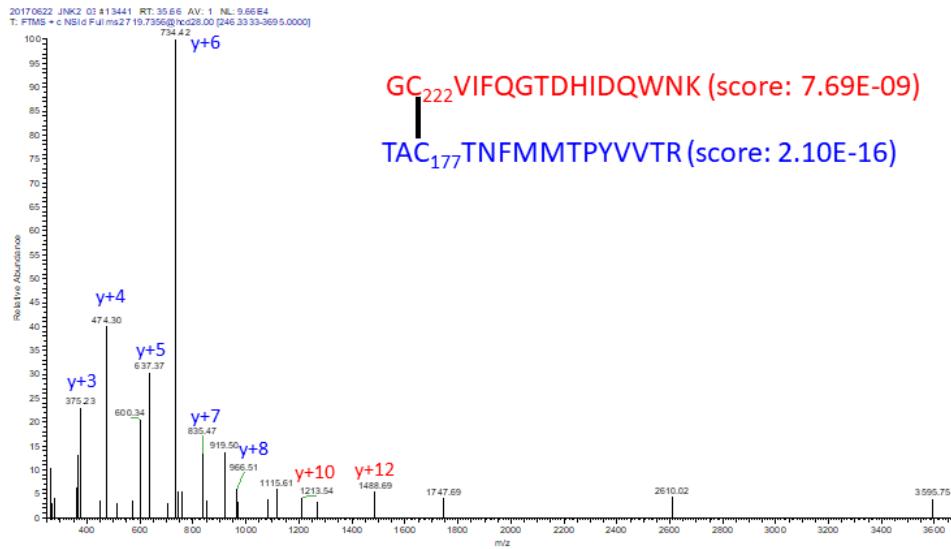

Fig. S7. Positive ion MS2 spectrum of the (A) C222-C213 and (B) C222-C177 disulfide bonded peptides in JNK $\alpha$ 2. Spectra were obtained after incubating pre-reduced His-tagged JNK2 $\alpha$ 2 with 100  $\mu$ M H<sub>2</sub>O<sub>2</sub> in the presence of 5 mM dimedone. Free thiols were blocked with MSBT prior to digestion with trypsin. The resulting peptides were analyzed by LC-MS/MS using Q Exactive HF hybrid quadrupole-Orbitrap mass spectrometer (Thermo Scientific) coupled to a Dionex Ultimate-3000 nano-UPLC system (Thermo Scientific) and a Nanospray Flex Ion Source (Thermo Scientific).

## References

1. Sievers, F., Wilm, A., Dineen, D., Gibson, T. J., Karplus, K., Li, W., Lopez, R., McWilliam, H., Remmert, M., Soding, J., Thompson, J. D., and Higgins, D. G. (2011)

- Fast, scalable generation of high-quality protein multiple sequence alignments using Clustal Omega. *Mol Syst Biol* **7**, 539
2. Kallunki, T., Su, B., Tsigelny, I., Sluss, H. K., Derijard, B., Moore, G., Davis, R., and Karin, M. (1994) JNK2 contains a specificity-determining region responsible for efficient c-Jun binding and phosphorylation. *Genes Dev* **8**, 2996-3007
  3. Nitta, R. T., Chu, A. H., and Wong, A. J. (2008) Constitutive activity of JNK2 alpha2 is dependent on a unique mechanism of MAPK activation. *J Biol Chem* **283**, 34935-34945
